# Supplementary material
Source: publisher site journal article supplement (https://www.dovepress.com/article/257317)
Supplement: Supplementary file 1 [file get_supplementary_file.php]

Supplementary materials

**A public consultation: who to tell, how and when?**

We want to create a programme to help support people with dementia in talking to others about their diagnosis.

By participating in this consultation, you guide the direction of our research. The survey will take 5-15 minutes to complete.

**We want this survey to gather your thoughts and views. Only answer questions if you want to. If you would like to stop at any point just close the browser. This survey is anonymous.**

If you have any questions about this public consultation or study please feel free to contact:   Jem Bhatt Research Department of Clinical, Educational and Health Psychology University College London 
Direct Telephone: 020 7679 8275. Email: jemini.bhatt.15@ucl.ac.uk

- I have read the above information and wish to continue
- I do not wish to continue

Skip To: End of Survey If = I do not wish to continue

1. Which of the below best describes you:
   (you can select more than one if you wish)

- Person living with dementia
- Health/Social care worker
- Carer/Relative of a person living with dementia
- Member of the public
- Other (please specify) ________________________________________________

1. What do you think may stop people from telling others that they have dementia? You can select more than one

- Worry that others will view them differently (example, less able)
- Shame
- Unsure of what to say or what language to use
- Not wanting to use the word "dementia"
- Not knowing who to tell
- Scared of what might be ahead
- Talking about it makes it more real
- Not accepting or denying the diagnosis
- Worry about losing relationships
- Worry that others may avoid or exclude them
- Not wanting to burden or upset others
- Carer or family not wanting them to tell others
- Other (please specify) ________________________________________________

1. Nowadays most people are directly told by their doctors that they have dementia. Currently, there is no advice given to people on how they can tell others about their dementia.

Do you think people who are newly diagnosed with dementia, and unsure whether or how to talk to others about their diagnosis, might benefit from support with this?

- Yes
- Not Sure
- No
- Other (please specify) ________________________________________________

1. We want to create a programme to support individuals newly diagnosed with dementia to talk about their diagnosis should they wish to. This will be the first programme of its kind in dementia care. We are planning to adapt an existing programme that was developed to support people with other 'difficult to discuss' diagnoses. The programme was originally delivered over 3 weekly sessions lasting 1h30mins each. The existing programme has the below topics:

**Contents**

**Who am I going to tell about my diagnosis?**

*What are hurtful and helpful attitudes towards my diagnosis?*

*What does my diagnosis mean to me?*

*What problems will I face telling others and how can they hurt me?*

*What are the pros and cons of telling others and should I tell them or not?*

**How and when to tell others**

*What are the different ways to tell others and what are the pros and cons of these ways?*

*Who do I select to tell?*

*What language do I use?*

*How will others respond to me and how will this make me feel?*

**My own story**

*Combining everything I have learnt so far.*

*Deciding whether telling others is right for me.*

Do you think the above programme is suited to people with dementia?

- Yes - this programme seems suited for people living with dementia as it is
- No - the programme needs adaptation to be more dementia specific
- Other (please specify) ________________________________________________

You have answered "no", please use this box to explain why this programme is not suited to people with dementia

________________________________________________________________

1. Do you have any suggestions about what this programme should be called?
   ________________________________________________________________
2. What do you think is the best way of delivering this programme? (you may select multiple answers)

- Face to face with a trained facilitator
- Guided self-help (e.g. individuals complete a workbook with regular contact from trained facilitators)
- Other (please specify) _______________________________________________

1. From the below which face-to-face method would be best?

    *Please use the text boxes beside each answer if you have further comments*

- Small group of people with dementia and a trained programme facilitator ________________________________________________
- One to one with a person living with dementia and a trained program facilitator ________________________________________________
- Person living with dementia, a supporter of their choice (e.g. family member, friend) and a trained programme leader ________________________________________________
- Other (please specify) ________________________________________________

If this programme is delivered in small groups of people with dementia, how long should it last?

- 3 weekly sessions lasting 1-1h30mins each
- One whole day with breaks and lunch
- Other (please specify) ________________________________________________

If this programme is delivered one to one, how long should it last?

- 3 weekly sessions lasting 1-1h30mins each
- One whole day with breaks and lunch
- Other (please specify) ________________________________________________

1. From the below what is your most preferred "guided self-help" method of delivering this programme?

    *Please use the text boxes beside each answer if you have further comments*

- A printed workbook ______________________________________________
- An online workbook ________________________________________________
- Other (please specify) ________________________________________________

Do you think the printed workbook should be completed alongside regular telephone or email contact with a trained facilitator?

- Yes
- No

Do you think the online workbook should be completed alongside regular telephone or email contact with a trained facilitator?

- Yes
- No

1. What do you think would help people with dementia take part in this programme? (you may select multiple answers)

- Previous knowledge about dementia
- Support from their family or friends
- Trained facilitator with personal experience of dementia
- More information to help them decide if it is for them
- Group delivery to take place outside clinical settings (e.g. community centre)
- Built-in involvement of primary supporter
- Other (please specify) ________________________________________________

1. What do you think would stop people with dementia taking part in this programme? (you may select multiple answers)

- Not knowing enough about dementia
- Embarrassment
- Wanting to "keep it in the family"
- Not wanting "outside help"
- Fear of diagnosis
- Wanting to keep the diagnosis to themselves
- May have other ways of deciding who to tell, how and when
- Not knowing the programme exists
- Worrying about travelling (if it is a group programme)
- Not wanting to be in a group with other people who have dementia
- Other (please specify) ________________________________________________

1. Would you like to hear more about developing this programme?

- Yes
- No

Skip To: End of Survey If = No

Thank you for your interest in developing this programme. 
Please contact Jem Bhatt for more information.


**Direct Telephone:** 020 7679 8275 **Email:** jemini.bhatt.15@ucl.ac.uk
**Postal Address:** 
Jem Bhatt Research Department of Clinical, Educational and Health Psychology,  University College London 4th Floor, 1-19 Torrington Place, WC1E 7HB

Thank you for completing the questionnaire. If you have any further comments please write them in the space provided below

____________________________________________________________
